# Supplementary material
Source: Springer Nature journal article supplement (https://www.springermedizin.de/resource/supplementary/12916_2013_1079_MOESM2_ESM.pdf/9598842)

■ Males ■ Females

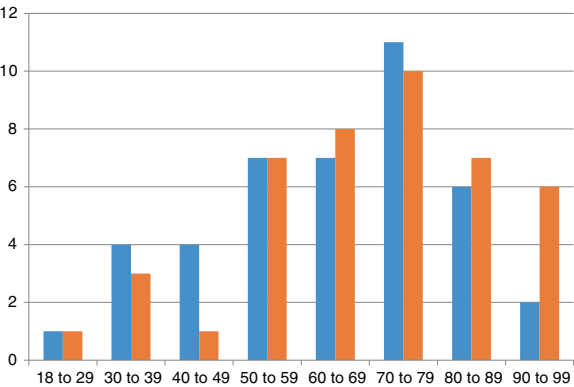

Supplement: MOESM2 [file 9598842]
